# Supplementary material for: Structural and mechanistic characterization of an archaeal-like chaperonin from a thermophilic bacterium
Source: PubMed Central journal article supplement (PMC5635000; doi:10.1038/s41467-017-00980-z), 2017-10-10
Supplement: 41467_2017_980_MOESM2_ESM.pdf [file 41467_2017_980_MOESM2_ESM.pdf]

### **Description of Supplementary Files**

File name: Supplementary Movie 1

Description: The side view of ring closure dynamics

File name: Supplementary Movie 2

Description: The top view of ring closure
